# Supplementary material for: Genome-wide identification of the rubber tree superoxide dismutase (SOD) gene family and analysis of its expression under abiotic stress
Source: PeerJ. 2022 Oct 24;10:e14251. doi: 10.7717/peerj.14251 (PMC9610661; doi:10.7717/peerj.14251)
Supplement: Supplemental Information 2 [file peerj-10-14251-s002.xlsx]

## Sheet: Tabel S2
Table S2.The Information of SOD family genes in Arabidopsis thaliana, Populus euphratica,Ricinus communis
spicions's names	Gene name	Gene ID	Protein sequence
Arabidopsis thaliana	AtCSD1	AT1G08830	MAKGVAVLNSSEGVTGTIFFTQEGDGVTTVSGTVSGLKPGLHGFHVHALGDTTNGCMSTGPHFNPDGKTHGAPEDANRHAGDLGNITVGDDGTATFTITDCQIPLTGPNSIVGRAVVVHADPDDLGKGGHELSLATGNAGGRVACGIIGLQG
	AtCSD2	AT2G28190	MAATNTILAFSSPSRLLIPPSSNPSTLRSSFRGVSLNNNNLHRLQSVSFAVKAPSKALTVVSAAKKAVAVLKGTSDVEGVVTLTQDDSGPTTVNVRITGLTPGPHGFHLHEFGDTTNGCISTGPHFNPNNMTHGAPEDECRHAGDLGNINANADGVAETTIVDNQIPLTGPNSVVGRAFVVHELKDDLGKGGHELSLTTGNAGGRLACGVIGLTPL
	AtCSD3	AT5G18100	MEAPRGNLRAVALIAGDNNVRGCLQFVQDISGTTHVTGKISGLSPGFHGFHIHSFGDTTNGCISTGPHFNPLNRVHGPPNEEERHAGDLGNILAGSNGVAEILIKDKHIPLSGQYSILGRAVVVHADPDDLGKGTKH
	AtFSD1	AT4G25100	MAASSAVTANYVLKPPPFALDALEPHMSKQTLEFHWGKHHRAYVDNLKKQVLGTELEGKPLEHIIHSTYNNGDLLPAFNNAAQAWNHEFFWESMKPGGGGKPSGELLALLERDFTSYEKFYEEFNAAAATQFGAGWAWLAYSNEKLKVVKTPNAVNPLVLGSFPLLTIDVWEHAYYLDFQNRRPDYIKTFMTNLVSWEAVSARLEAAKAA SA
	AtFSD2	AT5G51100	MMNVAVTATPSSLLYSPLLLPSQGPNRRMQWKRNGKRRLGTKVAVSGVITAGFELKPPPYPLDALEPHMSRETLDYHWGKHHKTYVENLNKQILGTDLDALSLEEVVLLSYNKGNMLPAFNNAAQAWNHEFFWESIQPGGGGKPTGELLRLIERDFGSFEEFLERFKSAAASNFGSGWTWLAYKANRLDVANAVNPLPKEEDKKLVIVKTPNAVNPLVWDYSVSDLTFNI
	AtFSD3	AT5G23310	MSSCVVTTSCFYTISDSSIRLKSPKLLNLSNQQRRRSLRSRGGLKVEAYYGLKTPPYPLDALEPYMSRRTLEVHWGKHHRGYVDNLNKQLGKDDRLYGYTMEELIKATYNNGNPLPEFNNAAQVYNHDFFWESMQPGGGDTPQKGVLEQIDKDFGSFTNFREKFTNAALTQFGSGWVWLVLKREERRLEVVKTSNAINPLVWDDIPIICVDVWEHSYYLDYKNDRAKYINTFLNHLVSWNAAMSRMARAEAFVNLGEPNIPIA
	AtMSD1	AT3G10920	MAIRCVASRKTLAGLKETSSRLLRIRGIQTFTLPDLPYDYGALEPAISGEIMQIHHQKHHQAYVTNYNNALEQLDQAVNKGDASTVVKLQSAIKFNGGGHVNHSIFWKNLAPSSEGGGEPPKGSLGSAIDAHFGSLEGLVKKMSAEGAAVQGSGWVWLGLDKELKKLVVDTTANQDPLVTKGGSLVPLVGIDVWEHAYYLQYKNVRPEYLKNVWKVINWKYASEVYEKENN
	AtMSD2	AT3G56350	MTTTVIIIIFVAIFATTLHDARGATMEPCLESMKTASLPDLPYAYDALEPAISEEIMRLHHQKHHQTYVTQYNKALNSLRSAMADGDHSSVVKLQSLIKFNGGGHVNHAIFWKNLAPVHEGGGKPPHDPLASAIDAHFGSLEGLIQKMNAEGAAVQGSGWVWFGLDRELKRLVVETTANQDPLVTKGSHLVPLIGIDVWEHAYYPQYKNARAEYLKNIWTVINWKYAADVFEKHTRDLDIN
Populus euphratica	PeCSD1	LOC105128353	MQAAAMAAHAILTAAPPTRHPLLSPLPPNHSSFHGVSLKLPRQSFSFSLTAKKQQTPFVVAATKKAVAVLKGTSGVEGVVTLSQEDDGPTTVNVRITGLTPGPHGFHLHEFGDTTNGCMSTGAHFNPKNLTHGAPEDEIRLAGDLGNIVANADGVAEATIVDSQIPLSGPNAVIGRALVVHELEDDLGKGGHELSSTTGNAGGRLACGVVGLTPI
	PeCSD2	LOC105115520	MQAAAIAAMAAHAILTAIPPILHLPLSPLPPNHSSFHGISLNPSRQSFSLSLAAKKQPPLFVVASATKKAVAVLKGTSNVEGVIILTQEADGPTTVNARITGLTPGPHGFHLHQYGDTTNGCVSTGAHFNPNNLTHGAPEDEIRHAGDLGNIVANADGVAEAIIVDNQIPLSGPNTVFVRTLVVHELEDDLGKGRHELSSTTGNAGGRLACGVVGLTPV
	PeCSD3	LOC105132524	MATGSVKAVALITGASNVRGSLHFVQEPNGATHVTGRIAGLSPGLHGFHIHALGDTTNGCNSTGPHFNPLKKDHGAPSDNERHAGDLGNIIAGSDGVAEVSIKDLQIPLSGMHSILGRAVVVHADPDDLGKGGHELSKTTGNAGARVGCGIIGLKSSV
	PeCSD4	LOC105123542	MATGSVKAVALITGDSNVRGCLHFIQEPNGATHVTGRIAGLSPGLHGFHIHALGDTTNGCNSTGPHFNPLKKDHGAPCDNERHAGDLGNIIAGSDGVAEVSIKDFQIPLSGMHSILGRAVVVHADPDDLGKGGHDLSKTTGNAGARVGCGIIGLKSSV
	PeCSD5	LOC105132200	MAFLRSATTTTKTAIAAFALPAAFAFSSPSPSSPNPKPENLFFLSPSSSLLTSARFGLVKNLTQLTSSLSMDTSTSNQKPISQDNGALPEILTEFMVDMKCEGCVNSVRNKLQTVTGVKNVEVDLANQVVRILGSSPVKTMTEALEQTGRNARLIGQGIPEDFLVSAAVAEFKGPDIFGVVRFAQVNMELARIEASFSGVSPGKHGWSINEFGDLTEGAASTGKVFNPTNQGTEQEPLGDLGTLDVDEKGDAFFSGTKRKLRVADLIGRSVVLFGTEDKSDKGLTAAVIARSAGVGENYKKICTCDGTIIWESSNNDFVASKV
	PeFSD1	LOC105123922	MGCFSYNLFSSSPSCQVPVTGSFACQFKTPPYKQLPTLFKQKRKQFNGCQRASRVVSYYALKTPPYKPNALEPYMSKRTVEVHWKEHHGAYVEGLNKALAKSDILYGYTLDDLVKVTYNNGNPSPEFNNAAQVWNHDFFWESMQPGGGDMPELGMLEQIEKDFGSFTNFRNKFAETALTLFGSGWVWLVLKREEPRLEVVKTLNAVTPIVWGDIPIINLDMWEHAYYLDYKNDKENYVNAFMDHLVSWNMAMARMARAEAFVNLGEPKIPIA
	PeFSD2	LOC105136612	MVAAAATATTANPLTCSLFPSQGLRGTTSGLQWTKRQCTRKASALTVTAKFELKPPPYPMNALEPQMSKDTFEYHWGKHHRAYVNNLNKQIEGTELDDMSLDDVVLITYNKGDPLPAFNNAAQAWNHEFFWESMKPGGGGKPSGELLQLMERDFGSFDKFVEEFKSAAATQFGSGWAWLIYKANRLDVGNAVNPCPSEEDKKLVVVKSPNAVNPLVWDYYHAYYLDFQVMFINRRPDYISIFMERLVSWDAVSARLEVARARAAEREIEEARKRKEEEEGNFADKEPAEIFIDGVADDSETD
	PeMSD1	LOC105115500	MALRSLVSRKTLGVGLKLQFRGLQTFTLPDLPYDYGALEPAISGEIMQLHHQKHHQTYITNYNKSLEQLHHAMEKGDSSAVVKLQSAIKFNGGGHVNHSIFWKNLTPVQEGGGEPPHGNLGWAIDEDFGSLDSLIKKMSTEGAAVQGSGWVWLGLDKESKKLVVETTENQDPLVTKGPLVPLLGVDVWEHAYYLQYKNVRPDYLKNIWKVMNWKYAGEVYDKESS
Ricinus communis	RcCSD1	LOC8275247	MAAHTIIAASPSYHALLSPASSPNLTHSLFHGNSVLKLSRQSVALSLSSAAKKSLTVVAATKKAVAVLKGNSNVEGVVTLTQGDDGPTTVNVRITGLTPGLHGFHLHEYGDTTNGCMSTGAHFNPKGLTHGSPEDDIRHAGDLGNIVANADGVAEATIVDSQIPLSGPNAVIGRALVVHELEDDLGKGGHELSLTTGNAGGRLACGVVGLTPV
	RcCSD2	LOC8276497	MAATGTVKAVALITGDPHVKGSLQFIQQTHGPTYVTGRISGLSPGLHGFHIHALGDTTNGCNSTGPHYNPLKRNHGAPFHEERHAGDLGNIVTGSDGIAEISIKDMQIPLTGPHSILGRAVVVHADPDDLGKGGHELSKTTGNAGARVGCGIIGLQSSV
	RcCSD3	LOC8272471	MAFLRSVTTTTNAAIAASALPAAFAISSLSSSSSSSQSSTPNPRTHNLSFLSTSSSSLPSRFGLVKNLTRPPSAVSMEAPTSDHKPNSQEDSILLPELLTEFMVDMKCEGCVGAVKNKLQTVNGVKNVEVDLGNQVVRVLGSSPVKIMTEALEQTGRTARLIGQGVPEDFLVSAAVAEFKGPDIFGVVRFAQVNMELARIEANFSGLSPGKHGWSINEFGDLTRGAASTGKVYNPSNQGTEKEPQGDLGTLEVDENGEAFFSGSKQKLRVVDLIGRSVVVYGTEDKSDNGLTAAVIARSAGVGENYKKLCTCDGTTIWESSNKDFVTSKV
	RcFSD1	LOC8275451	MVAVAAASTSLTCALFPSQGGFSVATRRSQWTEKRKCTRKTTPARITAIFELKPPPYPLDALEPLMSKDTLEYHWGKHHRAYVDNLNKQIVGTELDGMSLEDVVLVTYNKGDMLPAFNNAAQAWNHEFFWGCMKPGGGGKPSGELLQLIERDFGSFERFVEEFKAAAATQFGSGWAWLAYKANRLDVENALNPCPSEEDKKLVVVKSPNAVIPLVWDYYPLLTIDVWEHAYYLDFQNRRPDYISTFLEKLVSWEAVSARLEAAKAQVSEREQEERRKSEEDEDVTPSSDAVEMYLDSENDESEAD
	RcFSD2	LOC8276651	MSWCCNLSPPRSRLLVGDYSLQLKNLDLKLLSLRNKQKRRQFQRASKLVAYYGLKTPPYPLDALEPYMSRKTLEIHWGEHHRAYVEGLNKQLAKDDILYGYTMDELVKVTYNNGNPFPEFNNAAQVWNHDFFWESMQPAGGEMPELGVLQQIEKDFGSFTNFKEKFIEEALTLFGSGWIWLVLKREERQLAIIKTSNANNPLVWDDIPIICLDMWEHAYYLDYKNDRGKYVNAFMNHLISWNAVMARMARAEAFVNLGEPKIPVA
	RcMSD1	LOC8259539	MALKTLTLPDLPYAYDALEPFISGEIMFLHHQKHHLAYVTNYNKSLELLNQAIANGDSSSVVKLQSSIKFNGGGHINHSIFWKNLAPVSEGGGIPPHGSLASAIDTEFGSLEKLIQKMNAEGAAVEGSGWVWLGVDKDSKKLVVATTQNQDPLVTKGPTLVPLLGIDVWEHAYYLQYKNVRPDYLKSIWNVMNWKYASEVYESICPSF
	RcMSD2	LOC8259540	MALRSLATRNTLGSAYKAAALGIAQVRGLKTFTLPDLPYDYSALEPVISGEIMQLHHQKHHQTYITNYNK SLELLNEAMEKGDSSSVVKLQSAIKFNGGGHINHSIFWNNLAPVREGGGEPPHGSLGWAIDTDFGSLEKL IQKMNTEGAAVQGSGWVWLGVDKASKKLVVETTANQDPLVTKAPTLVPLLGIDVWEHAYYLQYKNVRPDY LKNIWKVMNWKYASEVYAKECPSA
Hevea brasiliensis	HbCSD1	XM_021813882.1	MVKAVAVLGSSEGVSGTIFFSQEGDGQTTVTGNVSGLKPGLHGFHVHALGDTTNGCMSTGPHFNPASKEHGAPEDENRHAGDLGNINVGDDGTASFTIVDKHIPLSGLNSIIGRAVVVHSDPDDLGKGGHELSKTTGNAGGRAACGIIGLQG
	HbCSD2	XM_021813881.1	MLKAVAVITSSEGISGKIFFTQEGDGPTTVTGSVSGLKPGLHGFHVHTFGDTTNGCLSTGIVNWQGLHFNPASKDHGGPEDENRHAGDLGNVNVGDDGTANFTIVDKHIPLSGPHSIAGRSVVFHEGRDDLGKGGHELSKITGNAGDRIACGIIGLQE
	HbCSD3	XM_021836413.1	MQASAVAAMAAHAILAASPSSYPLLSPLPNPNISHHPALHTSFHGVSLKFPRQSLALSLAAASPRKPLAVVAATKKAVAVLKGTSNVEGVVTLTQEGDGPTTVNVRVTGLTPGPHGFHLHEYGDTTNGCISTGAHFNPTNMTHGAPEDEVRHAGDLGNIVANADGVAEATIADKQIPLDGPNTVIGRAFVVHELEDDLGKGGHELSLTTGNAGGRLACVAAVPKKRTSISKKRIRKNIWKRKGYWAALKAYSLAKSLYTGKSKSFLCDNLKKE
	HbCSD4	ON011077	MVDMRCEGCVNAVENKLQTVNGVKMVEMDLGSQVVRVLGSSPVKTMTEALEQTGRNARLIGQGVPEDFLVSAAVAEFKSPKIFGVVRFAQLNMELSRIEANFSGLSRGKHSWTVNEYVDLTRDAASIGKVYNPAARGSEKEICIFICHGEAFFASVKQKRIVVDLIGRSVVVHGTEDKSDGGLTAAVIARSAGVGENYKKICTCDGTIIWESSNKDFVTCKV
	HbCSD5	XM_021808273.1	MGFLRSVTTTTKTAIAASALPAAFTLYSSQSSTPNPKPHNLSFLSISSSSLRPPTRFGLAKNLASPPSAVKMDAPTSDRKHTPQEDAVLPELLTEFMVDMKCEGCVNSVKNKLQTVNGVKNVEVDLGNQVVRVLGSSPVKTLTEALEQTGRKARLIGQGVPEDFLVSAAVAEFKGPDIFGVVRFAQVNMELARIEANFSGLSPGKHGWTINEFGDLTRGAASTGQVYNPADQESGKEPLGDLGTLEVDEKGDAFFSGVKQKLRVVDLIGRSAVVYGTEDKSNGGLTAAVIARSAGVGENYKKVCTCDGTIIWESSNKDFVTSKV
	HbFSD1	XM_021812278.1	MVPAAATAASLNCALFHRQGGLNRATSGLQWTKKQQCTRKPGPAIITAKFELKPPPYPLNALEPHMSKDTLEYHWGKHHRAYVDNLNKQIVGTELDSMPLEDVVIVTYNKGDMLPAFNNAAQAWNHEFFWGCMKPGGGGKPSGELLQLIERDFGSFEKFVEEFKSAAATQFGSGWAWLVYKANRLDVENAVNPRPLEEDKKLVVVKSSNAVNPLVWDYSPLLTIDVWEHAYYLDFQNRRPDYISTFMEKLVSWEAASARLEVAKAQAAEREKEEQRKRDEAEDIQGSEAVEMYVDGETEDSGAD
	HbFSD2	XM_021826019.1	MSWCCTYNPLPLYSRLQVTDFSCSWQLKNAQKMLLSLGKKPEKKKQFYRFQTPSKVVAYYRLKTPPYKLDALEPYMSKRTLEMHWEEHHRAYVEGLNKQLANDDILYGYTMDELVKVTYNNGNPLPEFNNAAQVWNHDFFWESMQPGGGEMPELGVLQQIEKDFGSYTNFKEKFTESAFTLFGSGWIWLVLKREERQLAIIKTSNAITPLVWDDIPIICLDMWEHAYYLDYKNDREKYVNTFMNHLISWNVAMERMARAEAFVNLGNCTFFMVCSKSRCHMIFLMRGNSAN
	HbMSD1	XM_021829101.1	MALRSLVTRKNLPSAFKAATGLGQLRGLQTFSLPDLPYDYGALEPAISGEIMQLHHQKHHQTYITNYNKALEQLNDAIEKGDSAAVVKLQSAIKFNGGGHVNHSIFWKNLAPVREGGGELPHGSLGWAIDADFGSLEKLIQLMNAEGAALQGSGWVWLALDKELKKLVVETTANQDPLVTKGPTLVPLLGIDVWEHAYYLQYKNVRPDYLKNIWKVMNWKYASEVYAKECPSS
	HbMSD2	XM_021831459.1	MALRSLVARKTISSAFKAATGLRLGQLRGIQTYSLPDLPYDYGALEPVISGEIMQLHHQKHHQTYVTNFNTALEQLNDAMEKGDPAAVVKLQSAIKFNGGGHVNHSIFWKNLAPVREGGGEPPHSSLGWAIDTDFGSLEKLIQKINAEGAALQGSGWVWLALDKELKKLVVETTANQDPLVTKGPSLIPLLGIDVWEHAYYLQYKNVRPDYLKNIWKVMNWKYASEVYAKECPSS
