# Supplementary material for: Genome-wide identification of the rubber tree superoxide dismutase (SOD) gene family and analysis of its expression under abiotic stress
Source: PeerJ. 2022 Oct 24;10:e14251. doi: 10.7717/peerj.14251 (PMC9610661; doi:10.7717/peerj.14251)
Supplement: Supplemental Information 4 [file peerj-10-14251-s004.xlsx]

## Sheet: Tabel S4
Table S4. Information of hormone- and stress-related cis-elements detected in the promoters regions of HbSOD genes
Gene name	cis element	sequence	position	length	strand	plant source	cis element name
HbCSD1	TGACG-motif	TGACG	737	5	-	Hordeum vulgare	MeJA responsive element
HbCSD1	TGACG-motif	TGACG	1146	5	-	Hordeum vulgare	MeJA responsive element
HbCSD1	TGACG-motif	TGACG	1290	5	-	Hordeum vulgare	MeJA responsive element
HbCSD1	TGACG-motif	TGACG	1539	5	+	Hordeum vulgare	MeJA responsive element
HbCSD1	AE-box	AGAAACTT	1854	8	+	Arabidopsis thaliana	Light responsive element
HbCSD1	MBS	CAACTG	1211	6	+	Arabidopsis thaliana	Drought responsive element
HbCSD1	MBS	CAACTG	1947	6	+	Arabidopsis thaliana	Drought responsive element
HbCSD1	G-box	TACGTG	1990	6	-	Arabidopsis thaliana	Light responsive element
HbCSD1	GARE-motif	TCTGTTG	94	7	-	Brassica oleracea	Gibberellin responsive element
HbCSD1	ATCT-motif	AATCTAATCC	436	9	+	Pisum sativum	Light responsive element
HbCSD1	TGA-box	TGACGTAA	1287	8	-	Glycine max	Auxin responsive element
HbCSD1	ABRE	ACGTG	1990	5	-	Arabidopsis thaliana	Abscisic acid responsive element
HbCSD1	TCA-element	CCATCTTTTT	1372	9	+	Nicotiana tabacum	Salicylic acid element
HbCSD1	CGTCA-motif	CGTCA	737	5	+	Hordeum vulgare	MeJA responsive element
HbCSD1	CGTCA-motif	CGTCA	1146	5	+	Hordeum vulgare	MeJA responsive element
HbCSD1	CGTCA-motif	CGTCA	1290	5	+	Hordeum vulgare	MeJA responsive element
HbCSD1	CGTCA-motif	CGTCA	1539	5	-	Hordeum vulgare	MeJA responsive element
HbCSD2	Gap-box	CAAATGAA(A/G)A	1773	9.5	+	Arabidopsis thaliana	Light responsive element
HbCSD2	GATA-motif	GATAGGA	1055	7	-	Arabidopsis thaliana	light responsive element
HbCSD2	GATA-motif	AAGATAAGATT	1543	10	-	Arabidopsis thaliana	light responsive element
HbCSD2	TCCC-motif	TCTCCCT	1127	7	-	Spinacia oleracea	Light responsive element
HbCSD2	ARE	AAACCA	1417	6	+	Zea mays	Anaerobic responsive element
HbCSD2	LAMP-element	CTTTATCA	102	8	-	Pisum sativum	Light responsive element
HbCSD2	TCT-motif	TCTTAC	1929	6	+	Arabidopsis thaliana	Light responsive element
HbCSD3	TCA-element	CCATCTTTTT	1579	9	+	Nicotiana tabacum	Salicylic acid element
HbCSD3	CGTCA-motif	CGTCA	1108	5	-	Hordeum vulgare	MeJA responsive element
HbCSD3	AuxRR-core	GGTCCAT	1649	7	+	Nicotiana tabacum	Auxin responsive element
HbCSD3	ABRE	ACGTG	1277	5	-	Arabidopsis thaliana	Abscisic acid responsive element
HbCSD3	ABRE	ACGTG	1945	5	-	Arabidopsis thaliana	Abscisic acid responsive element
HbCSD3	ARE	AAACCA	168	6	-	Zea mays	Anaerobic responsive element
HbCSD3	ARE	AAACCA	675	6	-	Zea mays	Anaerobic responsive element
HbCSD3	GA-motif	ATAGATAA	1710	8	-	Arabidopsis thaliana	Light responsive element
HbCSD3	G-box	CACGTC	1277	6	+	Zea mays	Light responsive element
HbCSD3	G-box	TACGTG	1945	6	-	Arabidopsis thaliana	Light responsive element
HbCSD3	MBS	CAACTG	18	6	-	Arabidopsis thaliana	Drought responsive element
HbCSD3	MBS	CAACTG	175	6	+	Arabidopsis thaliana	Drought responsive element
HbCSD3	MBS	CAACTG	1661	6	-	Arabidopsis thaliana	Drought responsive element
HbCSD3	GT1-motif	GGTTAA	1237	6	+	Arabidopsis thaliana	light responsive element
HbCSD3	GT1-motif	GGTTAAT	1550	7	-	Avena sativa	light responsive element
HbCSD3	GT1-motif	GGTTAA	1551	6	-	Arabidopsis thaliana	light responsive element
HbCSD3	TCT-motif	TCTTAC	1948	6	-	Arabidopsis thaliana	Light responsive element
HbCSD3	TC-rich repeats	GTTTTCTTAC	1948	9	-	Nicotiana tabacum	Defense and Stress responsive element
HbCSD3	TGACG-motif	TGACG	1108	5	+	Hordeum vulgare	MeJA responsive element
HbCSD3	CAG-motif	GAAAGGCAGAC	256	10	+	Arabidopsis thaliana	Light responsive element
HbCSD4	CGTCA-motif	CGTCA	951	5	-	Hordeum vulgare	MeJA responsive element
HbCSD4	TCA-element	CCATCTTTTT	1105	9	+	Nicotiana tabacum	Salicylic acid element
HbCSD4	ABRE	ACGTG	1593	5	+	Arabidopsis thaliana	Abscisic acid responsive element
HbCSD4	ABRE	CACGTG	1612	6	-	Arabidopsis thaliana	Abscisic acid responsive element
HbCSD4	ABRE	ACGTG	1613	5	+	Arabidopsis thaliana	Abscisic acid responsive element
HbCSD4	G-Box	CACGTG	1612	6	-	Pisum sativum	Light responsive element
HbCSD4	TCCC-motif	TCTCCCT	1585	7	+	Spinacia oleracea	Light responsive element
HbCSD4	LTR	CCGAAA	1969	6	-	Hordeum vulgare	Low temperature responsive element
HbCSD4	P-box	CCTTTTG	1393	7	+	Oryza sativa	Gibberellin responsive element
HbCSD4	GARE-motif	TCTGTTG	1949	7	+	Brassica oleracea	Gibberellin responsive element
HbCSD4	G-box	CACGAC	45	6	+	Zea mays	Light responsive element
HbCSD4	G-box	TACGTG	1592	6	+	Arabidopsis thaliana	Light responsive element
HbCSD4	G-box	CACGTG	1612	6	-	Arabidopsis thaliana	Light responsive element
HbCSD4	MBS	CAACTG	1450	6	+	Arabidopsis thaliana	Drought responsive element
HbCSD4	TGACG-motif	TGACG	951	5	+	Hordeum vulgare	MeJA responsive element
HbCSD4	ARE	AAACCA	416	6	-	Zea mays	Anaerobic responsive element
HbCSD4	ARE	AAACCA	1309	6	-	Zea mays	Anaerobic responsive element
HbCSD5	CGTCA-motif	CGTCA	513	5	-	Hordeum vulgare	MeJA responsive element
HbCSD5	CGTCA-motif	CGTCA	1811	5	-	Hordeum vulgare	MeJA responsive element
HbCSD5	GATA-motif	AAGATAAGATT	744	10	-	Arabidopsis thaliana	Light responsive element
HbCSD5	AE-box	AGAAACAA	524	8	+	Arabidopsis thaliana	Light responsive element
HbCSD5	TGACG-motif	TGACG	513	5	+	Hordeum vulgare	MeJA responsive element
HbCSD5	TGACG-motif	TGACG	1811	5	+	Hordeum vulgare	MeJA responsive element
HbCSD5	TCT-motif	TCTTAC	821	6	-	Arabidopsis thaliana	Light responsive element
HbCSD5	GARE-motif	TCTGTTG	1228	7	+	Brassica oleracea	Gibberellin responsive element
HbCSD5	MBS	CAACTG	17	6	+	Arabidopsis thaliana	Drought responsive element
HbCSD5	ARE	AAACCA	1721	6	+	Zea mays	Anaerobic responsive element
HbFSD1	CGTCA-motif	CGTCA	1823	5	+	Hordeum vulgare	MeJA responsive element
HbFSD1	GATA-motif	GATAGGA	1898	7	-	Arabidopsis thaliana	Light responsive element
HbFSD1	ACE	GACACGTATG	1672	9	-	Petroselinum crispum	Light responsive element
HbFSD1	G-Box	CACGTG	1826	6	-	Pisum sativum	Light responsive element
HbFSD1	ABRE	TACGTGTC	1674	8	+	Oryza sativa	Abscisic acid responsive element
HbFSD1	ABRE	ACGTG	1675	5	+	Arabidopsis thaliana	Abscisic acid responsive element
HbFSD1	ABRE	CACGTG	1826	6	-	Arabidopsis thaliana	Abscisic acid responsive element
HbFSD1	ABRE	ACGTG	1827	5	+	Arabidopsis thaliana	Abscisic acid responsive element
HbFSD1	LTR	CCGAAA	799	6	+	Hordeum vulgare	Low temperature responsive element
HbFSD1	TCT-motif	TCTTAC	1592	6	-	Arabidopsis thaliana	Light responsive element
HbFSD1	AT1-motif	AATTATTTTTTATT	532	13	+	Solanum tuberosum	Light responsive element
HbFSD1	AT1-motif	AATTATTTTTTATT	940	13	+	Solanum tuberosum	Light responsive element
HbFSD1	G-box	TAACACGTAG	1673	9	-	Brassica oleracea	Light responsive element
HbFSD1	G-box	TACGTG	1674	6	+	Arabidopsis thaliana	Light responsive element
HbFSD1	G-box	CACGTG	1826	6	-	Arabidopsis thaliana	Light responsive element
HbFSD1	TGACG-motif	TGACG	1823	5	-	Hordeum vulgare	MeJA responsive element
HbFSD1	TC-rich repeats	GTTTTCTTAC	1592	9	-	Nicotiana tabacum	Defense and Stress responsive element
HbFSD1	ARE	AAACCA	276	6	-	Zea mays	Anaerobic responsive element
HbFSD2	ARE	AAACCA	1683	6	-	Zea mays	Anaerobic responsive element
HbFSD2	I-box	AAGATAAGGCT	78	10	-	Gossypium hirsutum	Light responsive element
HbFSD2	I-box	cCATATCCAAT	613	10	-	Flaveria trinervia	Light responsive element
HbFSD2	TCT-motif	TCTTAC	896	6	+	Arabidopsis thaliana	Light responsive element
HbFSD2	3-AF1 binding site	TAAGAGAGGAA	482	10	-	Solanum tuberosum	light responsive element
HbFSD2	G-box	CAGACGTGGCA	1354	10	-	Nicotiana plumbaginifolia	Light responsive element
HbFSD2	G-box	CACGTC	1357	6	+	Zea mays	Light responsive element
HbFSD2	MBS	CAACTG	1070	6	+	Arabidopsis thaliana	Drought responsive element
HbFSD2	AE-box	AGAAACTT	871	8	-	Arabidopsis thaliana	Light responsive element
HbFSD2	AE-box	AGAAACTT	949	8	+	Arabidopsis thaliana	Light responsive element
HbFSD2	TGACG-motif	TGACG	1359	5	-	Hordeum vulgare	MeJA responsive element
HbFSD2	TGACG-motif	TGACG	1449	5	-	Hordeum vulgare	MeJA responsive element
HbFSD2	P-box	CCTTTTG	1	7	+	Oryza sativa	Gibberellin responsive element
HbFSD2	P-box	CCTTTTG	152	7	+	Oryza sativa	Gibberellin responsive element
HbFSD2	P-box	CCTTTTG	213	7	-	Oryza sativa	Gibberellin responsive element
HbFSD2	CGTCA-motif	CGTCA	1359	5	+	Hordeum vulgare	MeJA responsive element
HbFSD2	CGTCA-motif	CGTCA	1449	5	+	Hordeum vulgare	MeJA responsive element
HbFSD2	TCA-element	CCATCTTTTT	424	9	+	Nicotiana tabacum	Salicylic acid element
HbFSD2	G-Box	CACGTT	1394	6	+	Pisum sativum	Light responsive element
HbFSD2	ABRE	ACGTG	1357	5	-	Arabidopsis thaliana	Abscisic acid responsive element
HbFSD2	ABRE	ACGTG	1394	5	-	Arabidopsis thaliana	Abscisic acid responsive element
HbMSD1	ARE	AAACCA	126	6	+	Zea mays	Anaerobic responsive element
HbMSD1	ARE	AAACCA	1151	6	+	Zea mays	Anaerobic responsive element
HbMSD1	ARE	AAACCA	1622	6	+	Zea mays	Anaerobic responsive element
HbMSD1	ARE	AAACCA	1746	6	+	Zea mays	Anaerobic responsive element
HbMSD1	ARE	AAACCA	1937	6	-	Zea mays	Anaerobic responsive element
HbMSD1	G-box	CACGAC	11	6	-	Zea mays	Light responsive element
HbMSD1	G-box	CACGTC	642	6	+	Zea mays	Light responsive element
HbMSD1	MBS	CAACTG	1196	6	-	Arabidopsis thaliana	Drought responsive element
HbMSD1	TCT-motif	TCTTAC	587	6	+	Arabidopsis thaliana	Light responsive element
HbMSD1	I-box	cCATATCCAAT	1690	10	+	Flaveria trinervia	Light responsive element
HbMSD1	MRE	AACCTAA	152	7	+	Petroselinum crispum	Light responsive element
HbMSD1	TGACG-motif	TGACG	644	5	-	Hordeum vulgare	MeJA responsive element
HbMSD1	TGACG-motif	TGACG	1908	5	+	Hordeum vulgare	MeJA responsive element
HbMSD1	AE-box	AGAAACTT	404	8	+	Arabidopsis thaliana	Light responsive element
HbMSD1	ATCT-motif	AATCTAATCC	930	9	-	Pisum sativum	Light responsive element
HbMSD1	P-box	CCTTTTG	93	7	+	Oryza sativa	Gibberellin responsive element
HbMSD1	GATA-motif	AAGATAAGATT	511	10	-	Arabidopsis thaliana	Light responsive element
HbMSD1	GATA-motif	GATAGGA	668	7	+	Arabidopsis thaliana	Light responsive element
HbMSD1	GATA-motif	GATAGGA	1507	7	+	Arabidopsis thaliana	Light responsive element
HbMSD1	CGTCA-motif	CGTCA	644	5	+	Hordeum vulgare	MeJA responsive element
HbMSD1	CGTCA-motif	CGTCA	1908	5	-	Hordeum vulgare	MeJA responsive element
HbMSD1	GTGGC-motif	CATCGTGTGGC	1500	10	-	Arabidopsis thaliana	Light responsive element
HbMSD1	GTGGC-motif	GATTCTGTGGC	1977	10	-	Spinacia oleracea	Light responsive element
HbMSD1	TATC-box	TATCCCA	493	7	-	Oryza sativa	Gibberellin responsive element
HbMSD1	G-Box	CACGTT	654	6	+	Pisum sativum	Light responsive element
HbMSD1	ABRE	ACGTG	642	5	-	Arabidopsis thaliana	Abscisic acid responsive element
HbMSD1	ABRE	ACGTG	654	5	-	Arabidopsis thaliana	Abscisic acid responsive element
HbMSD2	GA-motif	ATAGATAA	1448	8	-	Arabidopsis thaliana	Light responsive element
HbMSD2	ARE	AAACCA	476	6	+	Zea mays	Anaerobic responsive element
HbMSD2	ARE	AAACCA	1832	6	-	Zea mays	Anaerobic responsive element
HbMSD2	ARE	AAACCA	1919	6	+	Zea mays	Anaerobic responsive element
HbMSD2	GARE-motif	TCTGTTG	292	7	-	Brassica oleracea	Gibberellin responsive element
HbMSD2	TCT-motif	TCTTAC	360	6	-	Arabidopsis thaliana	Light responsive element
HbMSD2	TCT-motif	TCTTAC	1935	6	+	Arabidopsis thaliana	Light responsive element
HbMSD2	GT1-motif	GGTTAA	31	6	-	Arabidopsis thaliana	light responsive element
HbMSD2	GT1-motif	GGTTAAT	1640	7	-	Avena sativa	light responsive element
HbMSD2	GT1-motif	GGTTAA	1641	6	-	Arabidopsis thaliana	light responsive element
HbMSD2	AT1-motif	AATTATTTTTTATT	1235	13	+	Solanum tuberosum	Light responsive element
HbMSD2	AT1-motif	AATTATTTTTTATT	1357	13	+	Solanum tuberosum	Light responsive element
HbMSD2	TGA-element	AACGAC	1885	6	-	Brassica oleracea	Auxin responsive element
HbMSD2	MRE	AACCTAA	1643	7	+	Petroselinum crispum	Light responsive element
HbMSD2	TC-rich repeats	GTTTTCTTAC	214	9	-	Nicotiana tabacum	Defense and Stress responsive element
HbMSD2	ATCT-motif	AATCTAATCC	623	9	-	Pisum sativum	Light responsive element
HbMSD2	LTR	CCGAAA	1777	6	+	Hordeum vulgare	Low temperature responsive element
HbMSD2	GATA-motif	AAGATAAGATT	742	10	-	Arabidopsis thaliana	Light responsive element
HbMSD2	ABRE	ACGTG	1790	5	+	Arabidopsis thaliana	Abscisic acid responsive element
HbMSD2	G-Box	CACGTT	1789	6	-	Pisum sativum	Light responsive element
