# Supplementary material for: Genome-wide identification of the rubber tree superoxide dismutase (SOD) gene family and analysis of its expression under abiotic stress
Source: PeerJ. 2022 Oct 24;10:e14251. doi: 10.7717/peerj.14251 (PMC9610661; doi:10.7717/peerj.14251)
Supplement: Supplemental Information 5 [file peerj-10-14251-s005.xlsx]

## Sheet: Tabel S5
Table S5. The GO enrichment analysis of HbSOD genes.
Go Term	Go ID	GO annotation	Gene numbers	Gene name
biological_process	GO:0009987	cellular process	9	HbCSD1,HbFSD1,HbFSD2,HbCSD3,HbMSD2,HbCSD2,HbCSD5,HbCSD4,HbMSD1,
biological_process	GO:0008150	biological_process	9	HbCSD1,HbFSD1,HbFSD2,HbCSD3,HbMSD2,HbCSD2,HbCSD5,HbCSD4,HbMSD1,
biological_process	GO:0051716	cellular response to stimulus	7	HbCSD1,HbFSD1,HbFSD2,HbCSD3,HbMSD2,HbCSD2,HbMSD1,
biological_process	GO:0033554	cellular response to stress	7	HbCSD1,HbFSD1,HbFSD2,HbCSD3,HbMSD2,HbCSD2,HbMSD1,
biological_process	GO:0071451	cellular response to superoxide	7	HbCSD1,HbFSD1,HbFSD2,HbCSD3,HbMSD2,HbCSD2,HbMSD1,
biological_process	GO:0071450	cellular response to oxygen radical	7	HbCSD1,HbFSD1,HbFSD2,HbCSD3,HbMSD2,HbCSD2,HbMSD1,
biological_process	GO:0006950	response to stress	7	HbCSD1,HbFSD1,HbFSD2,HbCSD3,HbMSD2,HbCSD2,HbMSD1,
biological_process	GO:0034599	cellular response to oxidative stress	7	HbCSD1,HbFSD1,HbFSD2,HbCSD3,HbMSD2,HbCSD2,HbMSD1,
biological_process	GO:0000302	response to reactive oxygen species	7	HbCSD1,HbFSD1,HbFSD2,HbCSD3,HbMSD2,HbCSD2,HbMSD1,
biological_process	GO:0000303	response to superoxide	7	HbCSD1,HbFSD1,HbFSD2,HbCSD3,HbMSD2,HbCSD2,HbMSD1,
biological_process	GO:0000305	response to oxygen radical	7	HbCSD1,HbFSD1,HbFSD2,HbCSD3,HbMSD2,HbCSD2,HbMSD1,
biological_process	GO:0010035	response to inorganic substance	7	HbCSD1,HbFSD1,HbFSD2,HbCSD3,HbMSD2,HbCSD2,HbMSD1,
biological_process	GO:0098869	cellular oxidant detoxification	7	HbCSD1,HbFSD1,HbFSD2,HbCSD3,HbMSD2,HbCSD2,HbMSD1,
biological_process	GO:0034614	cellular response to reactive oxygen species	7	HbCSD1,HbFSD1,HbFSD2,HbCSD3,HbMSD2,HbCSD2,HbMSD1,
biological_process	GO:1990748	cellular detoxification	7	HbCSD1,HbFSD1,HbFSD2,HbCSD3,HbMSD2,HbCSD2,HbMSD1,
biological_process	GO:0006979	response to oxidative stress	7	HbCSD1,HbFSD1,HbFSD2,HbCSD3,HbMSD2,HbCSD2,HbMSD1,
biological_process	GO:0055114	obsolete oxidation-reduction process	7	HbCSD1,HbFSD1,HbFSD2,HbCSD3,HbMSD2,HbCSD2,HbMSD1,
biological_process	GO:0072593	reactive oxygen species metabolic process	7	HbCSD1,HbFSD1,HbFSD2,HbCSD3,HbMSD2,HbCSD2,HbMSD1,
biological_process	GO:0006801	superoxide metabolic process	7	HbCSD1,HbFSD1,HbFSD2,HbCSD3,HbMSD2,HbCSD2,HbMSD1,
biological_process	GO:1901701	cellular response to oxygen-containing compound	7	HbCSD1,HbFSD1,HbFSD2,HbCSD3,HbMSD2,HbCSD2,HbMSD1,
biological_process	GO:1901700	response to oxygen-containing compound	7	HbCSD1,HbFSD1,HbFSD2,HbCSD3,HbMSD2,HbCSD2,HbMSD1,
biological_process	GO:0009636	response to toxic substance	7	HbCSD1,HbFSD1,HbFSD2,HbCSD3,HbMSD2,HbCSD2,HbMSD1,
biological_process	GO:0098754	detoxification	7	HbCSD1,HbFSD1,HbFSD2,HbCSD3,HbMSD2,HbCSD2,HbMSD1,
biological_process	GO:0044237	cellular metabolic process	7	HbCSD1,HbFSD1,HbFSD2,HbCSD3,HbMSD2,HbCSD2,HbMSD1,
biological_process	GO:0050896	response to stimulus	7	HbCSD1,HbFSD1,HbFSD2,HbCSD3,HbMSD2,HbCSD2,HbMSD1,
biological_process	GO:0097237	cellular response to toxic substance	7	HbCSD1,HbFSD1,HbFSD2,HbCSD3,HbMSD2,HbCSD2,HbMSD1,
biological_process	GO:0008152	metabolic process	7	HbCSD1,HbFSD1,HbFSD2,HbCSD3,HbMSD2,HbCSD2,HbMSD1,
biological_process	GO:0070887	cellular response to chemical stimulus	7	HbCSD1,HbFSD1,HbFSD2,HbCSD3,HbMSD2,HbCSD2,HbMSD1,
biological_process	GO:0019430	removal of superoxide radicals	7	HbCSD1,HbFSD1,HbFSD2,HbCSD3,HbMSD2,HbCSD2,HbMSD1,
biological_process	GO:0042221	response to chemical	7	HbCSD1,HbFSD1,HbFSD2,HbCSD3,HbMSD2,HbCSD2,HbMSD1,
biological_process	GO:0062197	cellular response to chemical stress	7	HbCSD1,HbFSD1,HbFSD2,HbCSD3,HbMSD2,HbCSD2,HbMSD1,
biological_process	GO:0065007	biological regulation	5	HbCSD1,HbCSD3,HbCSD2,HbCSD5,HbCSD4,
biological_process	GO:0009314	response to radiation	4	HbCSD1,HbFSD1,HbCSD3,HbCSD2,
biological_process	GO:0009628	response to abiotic stimulus	4	HbCSD1,HbFSD1,HbCSD3,HbCSD2,
biological_process	GO:0009411	response to UV	4	HbCSD1,HbFSD1,HbCSD3,HbCSD2,
biological_process	GO:0009416	response to light stimulus	4	HbCSD1,HbFSD1,HbCSD3,HbCSD2,
biological_process	GO:0009743	response to carbohydrate	3	HbCSD1,HbCSD3,HbCSD2,
biological_process	GO:0009744	response to sucrose	3	HbCSD1,HbCSD3,HbCSD2,
biological_process	GO:0019222	regulation of metabolic process	3	HbCSD1,HbCSD3,HbCSD2,
biological_process	GO:0071704	organic substance metabolic process	3	HbCSD1,HbCSD3,HbCSD2,
biological_process	GO:0071457	cellular response to ozone	3	HbCSD1,HbCSD3,HbCSD2,
biological_process	GO:0071466	cellular response to xenobiotic stimulus	3	HbCSD1,HbCSD3,HbCSD2,
biological_process	GO:0071214	cellular response to abiotic stimulus	3	HbCSD1,HbCSD3,HbCSD2,
biological_process	GO:0071470	cellular response to osmotic stress	3	HbCSD1,HbCSD3,HbCSD2,
biological_process	GO:0010033	response to organic substance	3	HbCSD1,HbCSD3,HbCSD2,
biological_process	GO:0071472	cellular response to salt stress	3	HbCSD1,HbCSD3,HbCSD2,
biological_process	GO:0010038	response to metal ion	3	HbCSD1,HbCSD3,HbCSD2,
biological_process	GO:0010039	response to iron ion	3	HbCSD1,HbCSD3,HbCSD2,
biological_process	GO:0071478	cellular response to radiation	3	HbCSD1,HbCSD3,HbCSD2,
biological_process	GO:0016441	posttranscriptional gene silencing	3	HbCSD1,HbCSD3,HbCSD2,
biological_process	GO:0006970	response to osmotic stress	3	HbCSD1,HbCSD3,HbCSD2,
biological_process	GO:0071482	cellular response to light stimulus	3	HbCSD1,HbCSD3,HbCSD2,
biological_process	GO:0071229	cellular response to acid chemical	3	HbCSD1,HbCSD3,HbCSD2,
biological_process	GO:0071484	cellular response to light intensity	3	HbCSD1,HbCSD3,HbCSD2,
biological_process	GO:0071493	cellular response to UV-B	3	HbCSD1,HbCSD3,HbCSD2,
biological_process	GO:0104004	cellular response to environmental stimulus	3	HbCSD1,HbCSD3,HbCSD2,
biological_process	GO:0071236	cellular response to antibiotic	3	HbCSD1,HbCSD3,HbCSD2,
biological_process	GO:0031047	gene silencing by RNA	3	HbCSD1,HbCSD3,HbCSD2,
biological_process	GO:0016458	obsolete gene silencing	3	HbCSD1,HbCSD3,HbCSD2,
biological_process	GO:0051276	chromosome organization	3	HbCSD1,HbCSD3,HbCSD2,
biological_process	GO:0001101	response to acid chemical	3	HbCSD1,HbCSD3,HbCSD2,
biological_process	GO:0034644	cellular response to UV	3	HbCSD1,HbCSD3,HbCSD2,
biological_process	GO:0006996	organelle organization	3	HbCSD1,HbCSD3,HbCSD2,
biological_process	GO:0046677	response to antibiotic	3	HbCSD1,HbCSD3,HbCSD2,
biological_process	GO:0040029	regulation of gene expression, epigenetic	3	HbCSD1,HbCSD3,HbCSD2,
biological_process	GO:0060255	regulation of macromolecule metabolic process	3	HbCSD1,HbCSD3,HbCSD2,
biological_process	GO:0046688	response to copper ion	3	HbCSD1,HbCSD3,HbCSD2,
biological_process	GO:0050789	regulation of biological process	3	HbCSD1,HbCSD3,HbCSD2,
biological_process	GO:0010605	negative regulation of macromolecule metabolic process	3	HbCSD1,HbCSD3,HbCSD2,
biological_process	GO:0010608	posttranscriptional regulation of gene expression	3	HbCSD1,HbCSD3,HbCSD2,
biological_process	GO:0035194	post-transcriptional gene silencing by RNA	3	HbCSD1,HbCSD3,HbCSD2,
biological_process	GO:0035195	gene silencing by miRNA	3	HbCSD1,HbCSD3,HbCSD2,
biological_process	GO:0010629	negative regulation of gene expression	3	HbCSD1,HbCSD3,HbCSD2,
biological_process	GO:0048519	negative regulation of biological process	3	HbCSD1,HbCSD3,HbCSD2,
biological_process	GO:0071310	cellular response to organic substance	3	HbCSD1,HbCSD3,HbCSD2,
biological_process	GO:0071322	cellular response to carbohydrate stimulus	3	HbCSD1,HbCSD3,HbCSD2,
biological_process	GO:0071324	cellular response to disaccharide stimulus	3	HbCSD1,HbCSD3,HbCSD2,
biological_process	GO:0071329	cellular response to sucrose stimulus	3	HbCSD1,HbCSD3,HbCSD2,
biological_process	GO:0071840	cellular component organization or biogenesis	3	HbCSD1,HbCSD3,HbCSD2,
biological_process	GO:0043170	macromolecule metabolic process	3	HbCSD1,HbCSD3,HbCSD2,
biological_process	GO:0009892	negative regulation of metabolic process	3	HbCSD1,HbCSD3,HbCSD2,
biological_process	GO:0009642	response to light intensity	3	HbCSD1,HbCSD3,HbCSD2,
biological_process	GO:0016043	cellular component organization	3	HbCSD1,HbCSD3,HbCSD2,
biological_process	GO:0009651	response to salt stress	3	HbCSD1,HbCSD3,HbCSD2,
biological_process	GO:0006325	chromatin organization	3	HbCSD1,HbCSD3,HbCSD2,
biological_process	GO:0009410	response to xenobiotic stimulus	3	HbCSD1,HbCSD3,HbCSD2,
biological_process	GO:0010193	response to ozone	3	HbCSD1,HbCSD3,HbCSD2,
biological_process	GO:0010467	gene expression	3	HbCSD1,HbCSD3,HbCSD2,
biological_process	GO:0010468	regulation of gene expression	3	HbCSD1,HbCSD3,HbCSD2,
biological_process	GO:0034285	response to disaccharide	3	HbCSD1,HbCSD3,HbCSD2,
biological_process	GO:0010224	response to UV-B	3	HbCSD1,HbCSD3,HbCSD2,
biological_process	GO:0000003	reproduction	2	HbMSD2,HbMSD1,
biological_process	GO:0019725	cellular homeostasis	2	HbCSD5,HbCSD4,
biological_process	GO:0061458	reproductive system development	2	HbMSD2,HbMSD1,
biological_process	GO:0055065	metal ion homeostasis	2	HbCSD5,HbCSD4,
biological_process	GO:0055070	copper ion homeostasis	2	HbCSD5,HbCSD4,
biological_process	GO:0055076	transition metal ion homeostasis	2	HbCSD5,HbCSD4,
biological_process	GO:0006952	defense response	2	HbCSD1,HbCSD2,
biological_process	GO:0055080	cation homeostasis	2	HbCSD5,HbCSD4,
biological_process	GO:0055082	cellular chemical homeostasis	2	HbCSD5,HbCSD4,
biological_process	GO:0030003	cellular cation homeostasis	2	HbCSD5,HbCSD4,
biological_process	GO:0048437	floral organ development	2	HbMSD2,HbMSD1,
biological_process	GO:0044093	positive regulation of molecular function	2	HbCSD5,HbCSD4,
biological_process	GO:0009791	post-embryonic development	2	HbMSD2,HbMSD1,
biological_process	GO:0046916	cellular transition metal ion homeostasis	2	HbCSD5,HbCSD4,
biological_process	GO:0071241	cellular response to inorganic substance	2	HbCSD1,HbCSD2,
biological_process	GO:0099402	plant organ development	2	HbMSD2,HbMSD1,
biological_process	GO:0043085	positive regulation of catalytic activity	2	HbCSD5,HbCSD4,
biological_process	GO:0071248	cellular response to metal ion	2	HbCSD1,HbCSD2,
biological_process	GO:0048731	system development	2	HbMSD2,HbMSD1,
biological_process	GO:0042592	homeostatic process	2	HbCSD5,HbCSD4,
biological_process	GO:0050790	regulation of catalytic activity	2	HbCSD5,HbCSD4,
biological_process	GO:0007275	multicellular organism development	2	HbMSD2,HbMSD1,
biological_process	GO:0009838	abscission	2	HbMSD2,HbMSD1,
biological_process	GO:0071280	cellular response to copper ion	2	HbCSD1,HbCSD2,
biological_process	GO:0050801	ion homeostasis	2	HbCSD5,HbCSD4,
biological_process	GO:0044419	biological process involved in interspecies interaction between organisms	2	HbCSD1,HbCSD2,
biological_process	GO:0009605	response to external stimulus	2	HbCSD1,HbCSD2,
biological_process	GO:0009607	response to biotic stimulus	2	HbCSD1,HbCSD2,
biological_process	GO:0022414	reproductive process	2	HbMSD2,HbMSD1,
biological_process	GO:0009617	response to bacterium	2	HbCSD1,HbCSD2,
biological_process	GO:0009908	flower development	2	HbMSD2,HbMSD1,
biological_process	GO:0003006	developmental process involved in reproduction	2	HbMSD2,HbMSD1,
biological_process	GO:0090567	reproductive shoot system development	2	HbMSD2,HbMSD1,
biological_process	GO:0043207	response to external biotic stimulus	2	HbCSD1,HbCSD2,
biological_process	GO:0098771	inorganic ion homeostasis	2	HbCSD5,HbCSD4,
biological_process	GO:0048856	anatomical structure development	2	HbMSD2,HbMSD1,
biological_process	GO:0006873	cellular ion homeostasis	2	HbCSD5,HbCSD4,
biological_process	GO:0006875	cellular metal ion homeostasis	2	HbCSD5,HbCSD4,
biological_process	GO:0006878	cellular copper ion homeostasis	2	HbCSD5,HbCSD4,
biological_process	GO:0048608	reproductive structure development	2	HbMSD2,HbMSD1,
biological_process	GO:0048878	chemical homeostasis	2	HbCSD5,HbCSD4,
biological_process	GO:0098542	defense response to other organism	2	HbCSD1,HbCSD2,
biological_process	GO:0048367	shoot system development	2	HbMSD2,HbMSD1,
biological_process	GO:0065008	regulation of biological quality	2	HbCSD5,HbCSD4,
biological_process	GO:0065009	regulation of molecular function	2	HbCSD5,HbCSD4,
biological_process	GO:0010227	floral organ abscission	2	HbMSD2,HbMSD1,
biological_process	GO:0032501	multicellular organismal process	2	HbMSD2,HbMSD1,
biological_process	GO:0042742	defense response to bacterium	2	HbCSD1,HbCSD2,
biological_process	GO:0032502	developmental process	2	HbMSD2,HbMSD1,
biological_process	GO:0051704	multi-organism process	2	HbCSD1,HbCSD2,
biological_process	GO:0051707	response to other organism	2	HbCSD1,HbCSD2,
molecular function	GO:0003674	molecular_function	9	HbCSD1,HbFSD1,HbFSD2,HbCSD3,HbMSD2,HbCSD2,HbCSD5,HbCSD4,HbMSD1,
molecular function	GO:0016491	oxidoreductase activity	7	HbCSD1,HbFSD1,HbFSD2,HbCSD3,HbMSD2,HbCSD2,HbMSD1,
molecular function	GO:0003824	catalytic activity	7	HbCSD1,HbFSD1,HbFSD2,HbCSD3,HbMSD2,HbCSD2,HbMSD1,
molecular function	GO:0004784	superoxide dismutase activity	7	HbCSD1,HbFSD1,HbFSD2,HbCSD3,HbMSD2,HbCSD2,HbMSD1,
molecular function	GO:0016209	antioxidant activity	7	HbCSD1,HbFSD1,HbFSD2,HbCSD3,HbMSD2,HbCSD2,HbMSD1,
molecular function	GO:0016721	oxidoreductase activity, acting on superoxide radicals as acceptor	7	HbCSD1,HbFSD1,HbFSD2,HbCSD3,HbMSD2,HbCSD2,HbMSD1,
molecular function	GO:0043169	cation binding	5	HbCSD1,HbCSD3,HbCSD2,HbCSD5,HbCSD4,
molecular function	GO:0046914	transition metal ion binding	5	HbCSD1,HbCSD3,HbCSD2,HbCSD5,HbCSD4,
molecular function	GO:0005507	copper ion binding	5	HbCSD1,HbCSD3,HbCSD2,HbCSD5,HbCSD4,
molecular function	GO:0008270	zinc ion binding	5	HbCSD1,HbCSD3,HbCSD2,HbCSD5,HbCSD4,
molecular function	GO:0005488	binding	5	HbCSD1,HbCSD3,HbCSD2,HbCSD5,HbCSD4,
molecular function	GO:0046872	metal ion binding	5	HbCSD1,HbCSD3,HbCSD2,HbCSD5,HbCSD4,
molecular function	GO:0043167	ion binding	5	HbCSD1,HbCSD3,HbCSD2,HbCSD5,HbCSD4,
molecular function	GO:0140104	molecular carrier activity	2	HbCSD5,HbCSD4,
molecular function	GO:0008047	enzyme activator activity	2	HbCSD5,HbCSD4,
molecular function	GO:0016530	metallochaperone activity	2	HbCSD5,HbCSD4,
molecular function	GO:0016531	copper chaperone activity	2	HbCSD5,HbCSD4,
molecular function	GO:0016532	superoxide dismutase copper chaperone activity	2	HbCSD5,HbCSD4,
molecular function	GO:0098772	molecular function regulator	2	HbCSD5,HbCSD4,
molecular function	GO:0030234	enzyme regulator activity	2	HbCSD5,HbCSD4,
cellular component	GO:0005575	cellular_component	9	HbCSD1,HbFSD1,HbFSD2,HbCSD3,HbMSD2,HbCSD2,HbCSD5,HbCSD4,HbMSD1,
cellular component	GO:0044424	obsolete intracellular part	9	HbCSD1,HbFSD1,HbFSD2,HbCSD3,HbMSD2,HbCSD2,HbCSD5,HbCSD4,HbMSD1,
cellular component	GO:0110165	cellular anatomical entity	9	HbCSD1,HbFSD1,HbFSD2,HbCSD3,HbMSD2,HbCSD2,HbCSD5,HbCSD4,HbMSD1,
cellular component	GO:0043226	organelle	9	HbCSD1,HbFSD1,HbFSD2,HbCSD3,HbMSD2,HbCSD2,HbCSD5,HbCSD4,HbMSD1,
cellular component	GO:0043227	membrane-bounded organelle	9	HbCSD1,HbFSD1,HbFSD2,HbCSD3,HbMSD2,HbCSD2,HbCSD5,HbCSD4,HbMSD1,
cellular component	GO:0044444	obsolete cytoplasmic part	9	HbCSD1,HbFSD1,HbFSD2,HbCSD3,HbMSD2,HbCSD2,HbCSD5,HbCSD4,HbMSD1,
cellular component	GO:0043229	intracellular organelle	9	HbCSD1,HbFSD1,HbFSD2,HbCSD3,HbMSD2,HbCSD2,HbCSD5,HbCSD4,HbMSD1,
cellular component	GO:0043231	intracellular membrane-bounded organelle	9	HbCSD1,HbFSD1,HbFSD2,HbCSD3,HbMSD2,HbCSD2,HbCSD5,HbCSD4,HbMSD1,
cellular component	GO:0005737	cytoplasm	9	HbCSD1,HbFSD1,HbFSD2,HbCSD3,HbMSD2,HbCSD2,HbCSD5,HbCSD4,HbMSD1,
cellular component	GO:0044464	obsolete cell part	9	HbCSD1,HbFSD1,HbFSD2,HbCSD3,HbMSD2,HbCSD2,HbCSD5,HbCSD4,HbMSD1,
cellular component	GO:0005622	intracellular anatomical structure	9	HbCSD1,HbFSD1,HbFSD2,HbCSD3,HbMSD2,HbCSD2,HbCSD5,HbCSD4,HbMSD1,
cellular component	GO:0005623	obsolete cell	9	HbCSD1,HbFSD1,HbFSD2,HbCSD3,HbMSD2,HbCSD2,HbCSD5,HbCSD4,HbMSD1,
cellular component	GO:0044422	obsolete organelle part	7	HbFSD1,HbFSD2,HbCSD3,HbMSD2,HbCSD5,HbCSD4,HbMSD1,
cellular component	GO:0044446	obsolete intracellular organelle part	7	HbFSD1,HbFSD2,HbCSD3,HbMSD2,HbCSD5,HbCSD4,HbMSD1,
cellular component	GO:0009536	plastid	5	HbFSD1,HbFSD2,HbCSD3,HbCSD5,HbCSD4,
cellular component	GO:0044434	obsolete chloroplast part	5	HbFSD1,HbFSD2,HbCSD3,HbCSD5,HbCSD4,
cellular component	GO:0044435	obsolete plastid part	5	HbFSD1,HbFSD2,HbCSD3,HbCSD5,HbCSD4,
cellular component	GO:0009570	chloroplast stroma	5	HbFSD1,HbFSD2,HbCSD3,HbCSD5,HbCSD4,
cellular component	GO:0009507	chloroplast	5	HbFSD1,HbFSD2,HbCSD3,HbCSD5,HbCSD4,
cellular component	GO:0009532	plastid stroma	5	HbFSD1,HbFSD2,HbCSD3,HbCSD5,HbCSD4,
cellular component	GO:0044421	obsolete extracellular region part	3	HbCSD1,HbCSD3,HbCSD2,
cellular component	GO:0005576	extracellular region	3	HbCSD1,HbCSD3,HbCSD2,
cellular component	GO:0009579	thylakoid	3	HbFSD1,HbFSD2,HbCSD3,
cellular component	GO:0005615	extracellular space	3	HbCSD1,HbCSD3,HbCSD2,
cellular component	GO:0005634	nucleus	2	HbCSD1,HbCSD2,
cellular component	GO:0005829	cytosol	2	HbCSD1,HbCSD2,
cellular component	GO:0044429	obsolete mitochondrial part	2	HbMSD2,HbMSD1,
cellular component	GO:0009295	nucleoid	2	HbFSD1,HbFSD2,
cellular component	GO:0042644	chloroplast nucleoid	2	HbFSD1,HbFSD2,
cellular component	GO:0042646	plastid nucleoid	2	HbFSD1,HbFSD2,
cellular component	GO:0043228	non-membrane-bounded organelle	2	HbFSD1,HbFSD2,
cellular component	GO:0043232	intracellular non-membrane-bounded organelle	2	HbFSD1,HbFSD2,
cellular component	GO:0043233	organelle lumen	2	HbMSD2,HbMSD1,
cellular component	GO:0031974	membrane-enclosed lumen	2	HbMSD2,HbMSD1,
cellular component	GO:0005739	mitochondrion	2	HbMSD2,HbMSD1,
cellular component	GO:0070013	intracellular organelle lumen	2	HbMSD2,HbMSD1,
cellular component	GO:0005759	mitochondrial matrix	2	HbMSD2,HbMSD1,
cellular component	GO:0048046	apoplast	1	HbCSD3,
