# Supplementary material for: Genome-wide identification of the rubber tree superoxide dismutase (SOD) gene family and analysis of its expression under abiotic stress
Source: PeerJ. 2022 Oct 24;10:e14251. doi: 10.7717/peerj.14251 (PMC9610661; doi:10.7717/peerj.14251)
Supplement: Supplemental Information 6 [file peerj-10-14251-s006.xlsx]

## Sheet: Sheet1
Table S6. The expression profiles of HbSOD genes under various stress treatments
Treatments	Time	HbCSD1	HbCSD2	HbCSD3	HbCSD4	HbCSD5	HbFSD1	HbFSD2	HbMSD1	HbMSD2
Cold	0h	0.927624	1.18836	0.936938	1.1782	1.18253	0.929147	1.08167	1.06785	1.207
Cold	1h	0.640837	0.548135	0.681506	4.68586	0.887818	0.744912	0.667677	0.974355	0.746882
Cold	3h	1.01633	2.03881	1.02477	10.6861	0.889124	2.06658	1.0151	0.910201	1.07745
Cold	6h	1.01533	2.81443	0.783174	16.0342	0.788344	1.23102	1.10134	1.41914	1.03908
Cold	12h	0.797838	0.892152	0.371299	10.6638	0.846998	0.654624	0.491708	2.1047	0.874139
Cold	24h	1.23541	1.68808	0.993678	13.4085	1.16915	0.752673	0.890498	1.33397	1.44097
Cold	48h	2.64351	1.81921	2.65981	4.76588	2.09676	0.774076	0.672507	1.54916	1.12743
Heat	0h	0.927624	1.18836	0.936938	1.1782	1.18253	0.838467	1.08167	1.06785	1.207
Heat	1h	1.35124	0.983431	0.416829	9.74348	27.5445	5.31119	0.597098	0.773552	3.99622
Heat	3h	1.18454	0.973376	0.355855	5.61188	21.7966	1.71637	0.169	0.365542	1.26758
Heat	6h	0.727978	0.643971	0.233694	1.90473	12.0627	0.40972	0.270139	0.41425	0.950929
Heat	12h	0.459347	0.160749	0.141839	0.656225	9.54843	0.0569085	0.134205	0.79922	0.624256
Heat	24h	1.00727	0.0637818	0.401292	0.91939	36.7532	0.131049	0.191537	0.467522	0.767707
Heat	48h	1.74747	0.0392949	0.818795	1.15961	1.36363	0.0645965	0.130208	0.368327	0.598364
Drought	0h	1.0022	1.0022	1.0022	1.0022	1.0022	0.951035	1.0022	1.0022	1.0022
Drought	1h	2.17896	9.54595	5.81568	4.65154	4.74813	7.18561	14.4261	1.50024	1.34823
Drought	3h	0.767783	14.0582	3.52108	7.82245	1.35214	11.3714	9.18092	0.629176	0.680116
Drought	6h	0.576176	4.84132	1.69974	4.33196	1.52682	7.18023	3.86763	0.967126	0.371858
Drought	12h	0.786879	5.82033	1.72425	6.88356	1.47907	4.42892	2.96675	2.32388	0.687036
Drought	24h	0.904929	2.84698	3.2762	6.06853	1.15519	4.73405	1.48466	0.825477	0.769265
Drought	48h	0.606801	0.307216	0.27713	0.294143	0.451378	0.639203	0.173879	1.45414	0.763521
Salt	0h	1.0022	1.0022	1.0022	1.0022	1.0022	0.958338	1.0022	1.0022	1.0022
Salt	1h	0.437682	0.951611	0.361361	1.75596	2.15548	3.01819	0.472684	0.437952	1.85798
Salt	3h	0.684104	3.56118	0.398359	5.18368	1.24019	8.71811	1.09528	0.190722	2.80598
Salt	6h	0.571786	1.70027	0.432159	4.51342	2.36791	2.36538	0.546979	0.343894	0.986545
Salt	12h	0.457887	1.08164	0.251945	2.52514	2.01676	1.79963	0.445124	0.804637	1.52309
Salt	24h	0.195133	0.545958	0.223601	1.07044	0.895101	0.956411	0.129806	0.233168	0.817562
Salt	48h	0.844948	0.519626	0.783683	0.475858	0.0723251	0.128353	0.0667686	0.124813	0.627748
